# Supplementary material for: A novel label-free electrochemical immunosensor for the detection of hepatitis B surface antigen
Source: Royal Society of Chemistry journal article supplement (doi:10.1039/c6ay01959e), 2016-01-01
Supplement: c6ay01959e1.pdf [file c6ay01959e1.pdf]

## **Supplementary Material**

### **A novel label-free electrochemical immunosensor for the detection of Hepatitis B surface antigen**

Lihui Tian, Li Liu, Yueyuan Li, Xue Feng, Qin Wei and Wei Cao \*

Key Laboratory of Chemical Sensing & Analysis in Universities of Shandong, School  
of Chemistry and Chemical Engineering, University of Jinan, Jinan 250022, PR China

Corresponding author: Prof. W. Cao

Email address: jn\_chm302@163.com (jncw88@163.com)

Tel.: +86-531-82767890.

Fax: +86-531-82765475.

**Table S1** Comparison of different methods for the detection of HBsAg

| Methods                                   | Linear range    | Limit of detection | References   |
|-------------------------------------------|-----------------|--------------------|--------------|
| Chemiluminescence immunosassay            | 0.12-30 ng/mL   | 14 pg/mL           | 1            |
| Piezoelectric diaphragm-based immunoassay | 0.01-10000ng/mL | 0.1 ng/mL          | 2            |
| Electrochemical Impedance immunoassay     | 0.1-70 ng/mL    | 0.06 ng/mL         | 3            |
| Sandwich-type Electrochemical immunoassay | 0.0005-20 ng/mL | 0.2 pg/mL          | 4            |
| Label-free Electrochemical immunoassay    | 1-6 ng/mL       | 0.03 ng/mL         | 5            |
| Label-free Electrochemical immunoassay    | 0.001-80 ng/mL  | 0.31 pg/mL         | Present work |

**Table S2** Comparison with other sandwich-type electrochemical immunosensor using different nanomaterials

| Nanomaterials                                                             | Linear range     | Limit of detection | Reference    |
|---------------------------------------------------------------------------|------------------|--------------------|--------------|
| HA-NH <sub>2</sub> -CNT/NH <sub>2</sub> -CNT/<br>HBsAg                    | 1-6 ng/mL        | 0.03 ng/mL         | 5            |
| GCE/Au/Ab <sub>1</sub> /BSA/HBsAg/Pd/<br>$\delta$ -MnO <sub>2</sub> /HNTs | 0.001-20 ng/mL   | 0.3 pg/mL          | 6            |
| GCE/NPG/Ab/BSA/<br>HBsAg/AuNP-Ab-HRP                                      | 0.01-1.0 ng/mL   | 2.3 pg/mL.         | 7            |
| GCE/MNP-Ab/HBsAg/Ab-HRP                                                   | 0.001-0.015ng/mL | 0.9 pg/mL          | 8            |
| GCE/NiAuPt-NGs/Ab/BSA/<br>HBsAg/                                          | 0.001-80 ng/mL   | 0.31 pg/mL         | Present work |

**Table S3** Determination of HBsAg in human serum samples

| Initial HBsAg concentration in sample (ng/mL) | Added HBsAg concentration (ng/mL) | Measured concentration after addition (ng/mL) | Average value (ng/mL) | RSD (% ,n =5) | Recovery (% ,n =5) |
|-----------------------------------------------|-----------------------------------|-----------------------------------------------|-----------------------|---------------|--------------------|
|                                               | 1.0                               | 1.43, 1.47, 1.41, 1.53, 1.59                  | 1.49                  | 4.98          | 98.0               |
| 0.51                                          | 5.0                               | 5.27, 5.43, 5.69, 5.57, 5.38                  | 5.47                  | 3.01          | 99.2               |
|                                               | 10.0                              | 10.81,10.38,10.09, 10.24, 10.73               | 10.45                 | 2.97          | 99.4               |

## References

- 1 S. Sabouri, H. Ghourchian, M. Shourian and M. Boutorabi, *Anal. Methods.*, 2014, **6**, 5059-5066.
- 2 T. Xu, J. Miao, Z. Wang, L. Yu and C. Li, *Sensor. Actuat B-Chem.*, 2011, **151**, 370-376.
- 3 G. Shen, Y. Shen, X. Zhang and C. Zhang, *Electrochemistry*, 2016, **84**, 224-227.
- 4 Y. Li, L. Tian, H. Jia, X. Pang, W. Cao and Qin Wei, *Anal. Methods.*, 2015, **7**, 9150-9157.
- 5 G. Diego, Cabral, E. C.S. Lima, P. Moura and R. F. Dutra, *Talanta*, 2016, **148**, 209-215.
- 6 Y. Li, L. Tian, L. Liu, L. Liu, J. Li, Q. Wei and W. Cao, *New J. Chem.*, 2016, **40**, 558-563.
- 7 C. Ding, H. Li, K. Hu and J. Lin, *Talanta*, 2010, **80**, 1385–1391.
- 8 S. Nourani, H. Ghourchian and S. M. Boutorabi, *Anal. Biochem.*, 2013, **441**, 1-7.
